# Supplementary material for: Thermosensitive methyl-cellulose-based injectable hydrogel carrying oxaliplatin for the treatment of peritoneal metastasis in colorectal cancer
Source: Royal Society of Chemistry journal article supplement (doi:10.1039/d4tb00210e), 2024-01-01
Supplement: d4tb00210e1.pdf [file d4tb00210e1.pdf]

## Supporting information

### **Thermosensitive methyl cellulose-based injectable hydrogel carrying oxaliplatin for the treatment of peritoneal metastasis in colorectal cancer**

Ju Yang<sup>a,1</sup>, Yuanfeng Wei<sup>a,1</sup>, Ling Gao<sup>b</sup>, Zhaojun Li<sup>c</sup>, Xi Yang<sup>a,\*</sup>

<sup>a</sup> Division of Abdominal Tumor Multimodality Treatment, Cancer Center, West China Hospital, Sichuan University, Chengdu 610041, China.

<sup>b</sup> Department of Health Ward, The Affiliated Cancer Hospital of Guangzhou Medical University, Guangzhou 510095, China.

<sup>c</sup> Department of Radiation Oncology, Hainan General Hospital (Hainan Affiliated Hospital of Hainan Medical University), Haikou 570311, China.

\*Corresponding author.

E-mail addresses: yangxi0073@163.com (X. Yang)

<sup>1</sup> Equally contributed.

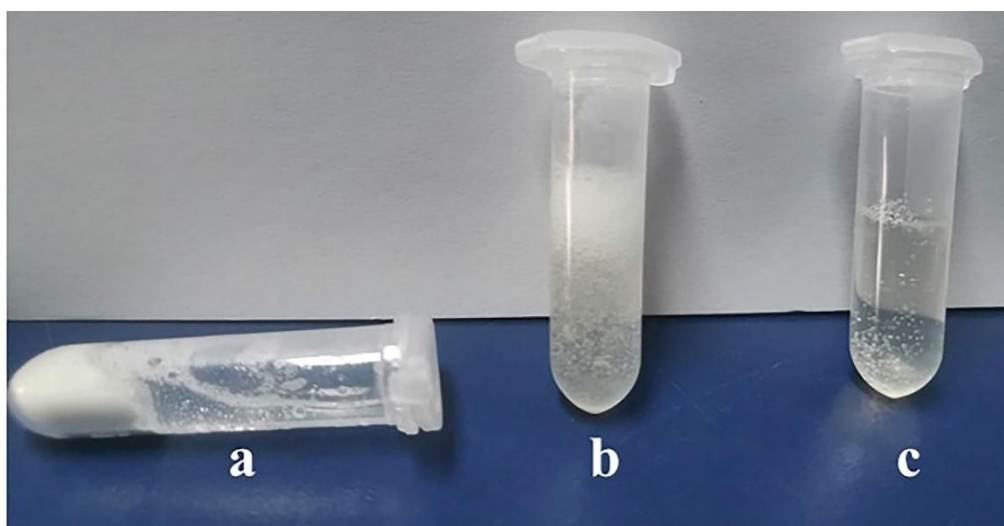

**Figure S1.** Sol-gel transition of MC hydrogel. (a) MC mixture; (b) MC sol; (c) MC hydrogel.

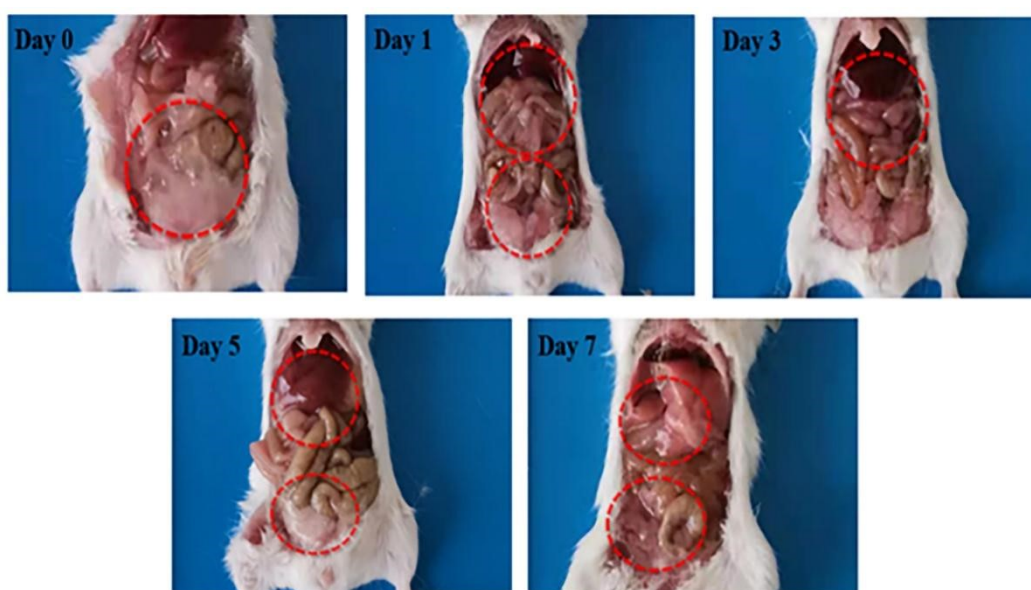

**Figure S2.** The degradation of MC hydrogel in vivo.

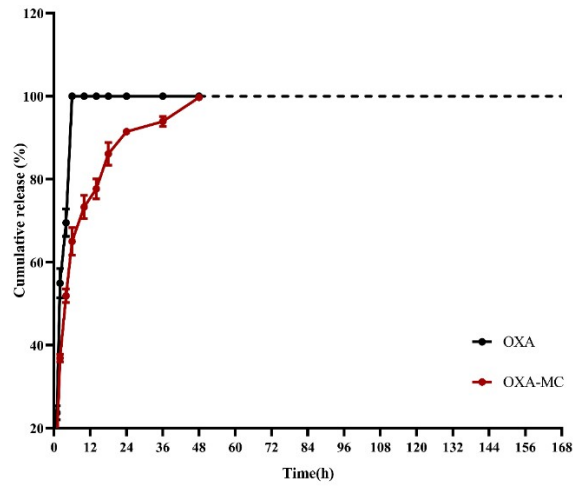

**Figure S3.** Drug release of OXA and OXA-MC hydrogel in vitro.

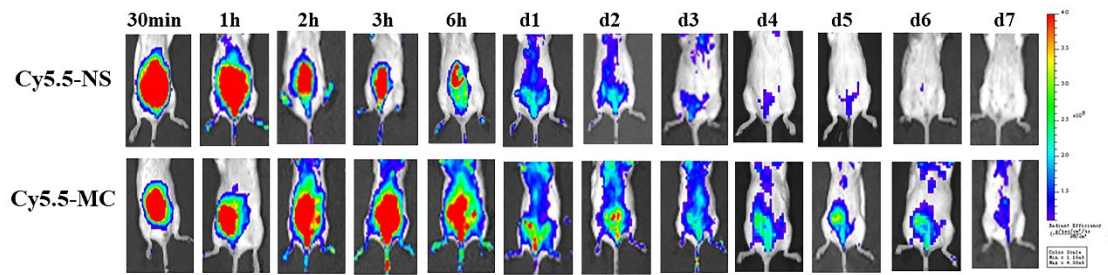

**Figure S4.** Sustained drug release behavior through MC hydrogel examined by IVIS Lumina III in vivo.

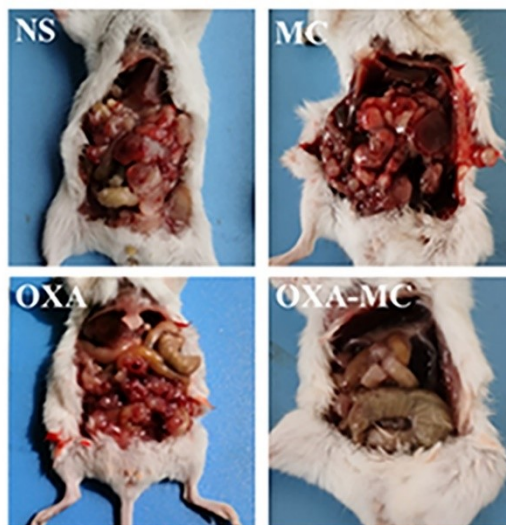

**Figure S5.** The visual laparotomy in each group.

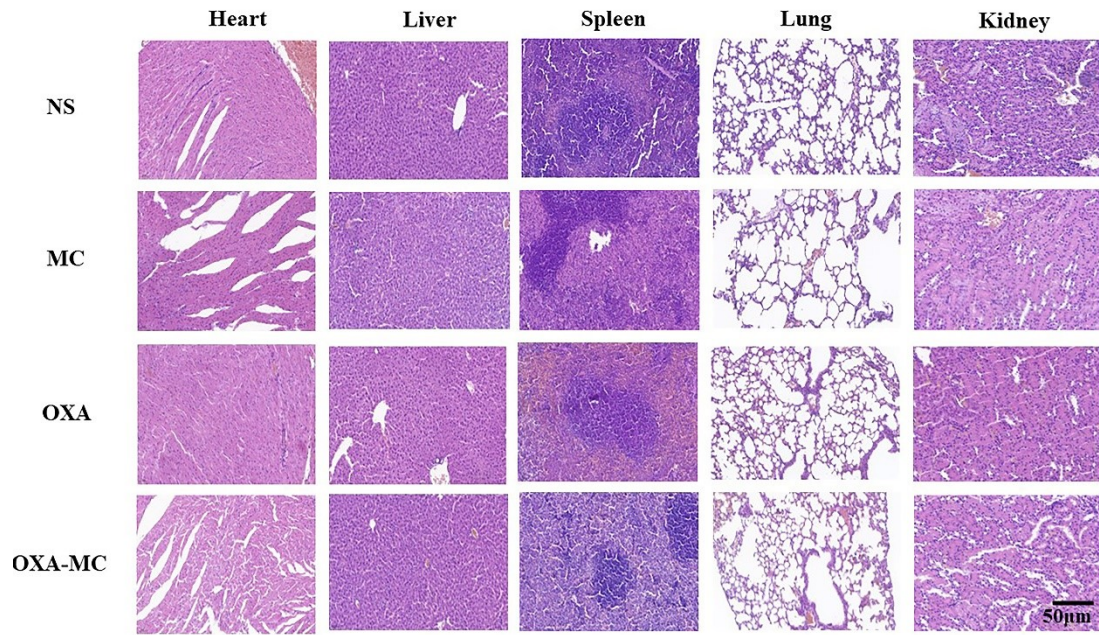

**Figure S6.** Pathological sections of vital organs in different treatment groups (scale bar = 50µm).

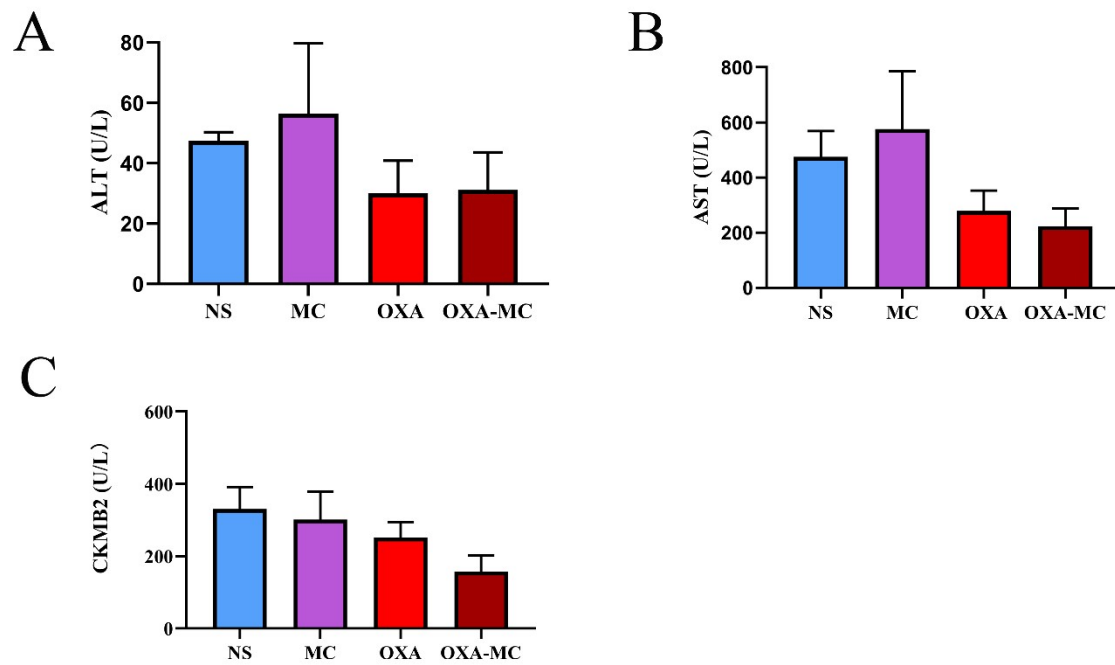

**Figure S7.** Main blood biochemical indicators in different treatment groups.
